# Supplementary material for: Hypercholesterolemia induced cerebral small vessel disease
Source: PubMed Central journal article supplement (PMC5552130; doi:10.1371/journal.pone.0182822), 2017-08-10
Supplement: pone.0182822.s001.pdf [file pone.0182822.s001.pdf]

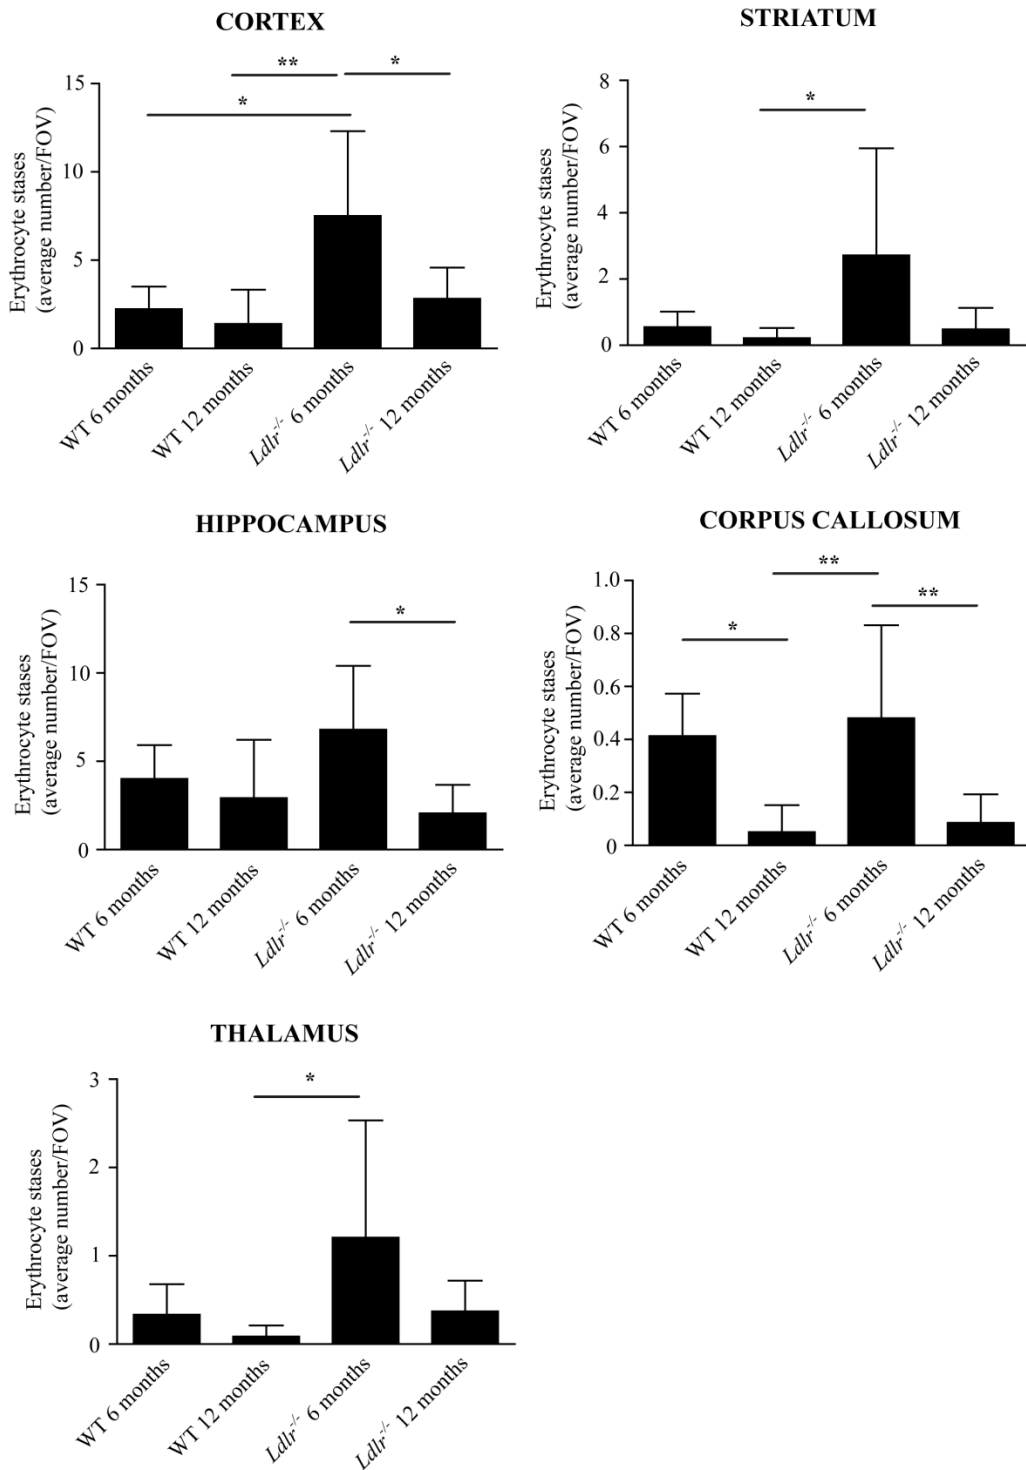

1

2 **S1 Fig.** Intravascular accumulation of erythrocytes (referred to as erythrocyte stases) in the capillaries  
 3 and arterioles of 6 and 12 months old WT and *Ldlr*<sup>-/-</sup> mice: analysis of different brain regions (cortex,  
 4 striatum, hippocampus, corpus callosum, thalamus). Analysis of variance with Bonferroni post-hoc test,  
 5 \*  $P < 0.05$ , \*\*  $P < 0.01$ . WT, wild-type; *Ldlr*<sup>-/-</sup>, low-density lipoprotein receptor deficient mice.
