# Supplementary material for: Hypercholesterolemia induced cerebral small vessel disease
Source: PubMed Central journal article supplement (PMC5552130; doi:10.1371/journal.pone.0182822), 2017-08-10
Supplement: pone.0182822.s004.pdf [file pone.0182822.s004.pdf]

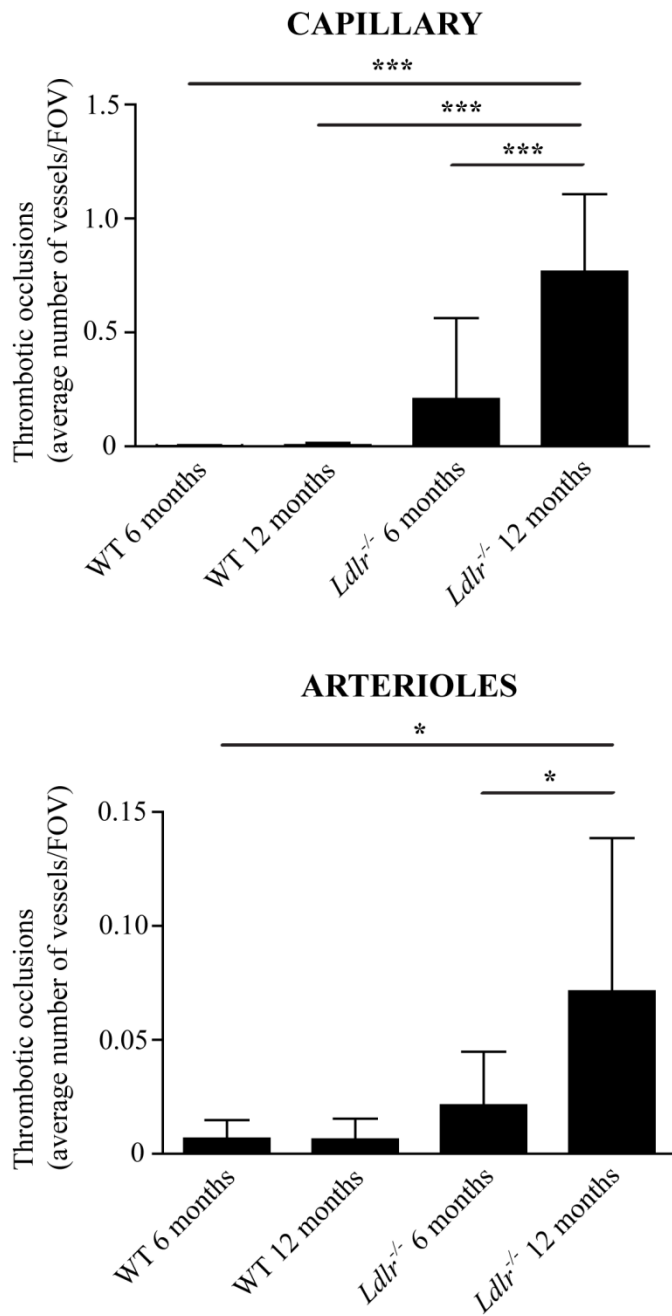

**S4 Fig.** Thrombotic occlusions (referred to as suspected fibrin thrombi) of capillaries or arterioles of 6 and 12 months old WT and *Ldlr*<sup>-/-</sup> mice. Analysis of variance with Bonferroni post-hoc test, \*  $P < 0.05$ , \*\*\*  $P < 0.001$ . WT, wild-type; *Ldlr*<sup>-/-</sup>, low-density lipoprotein receptor deficient mice.
