# Supplementary material for: Hypercholesterolemia induced cerebral small vessel disease
Source: PubMed Central journal article supplement (PMC5552130; doi:10.1371/journal.pone.0182822), 2017-08-10
Supplement: pone.0182822.s006.pdf [file pone.0182822.s006.pdf]

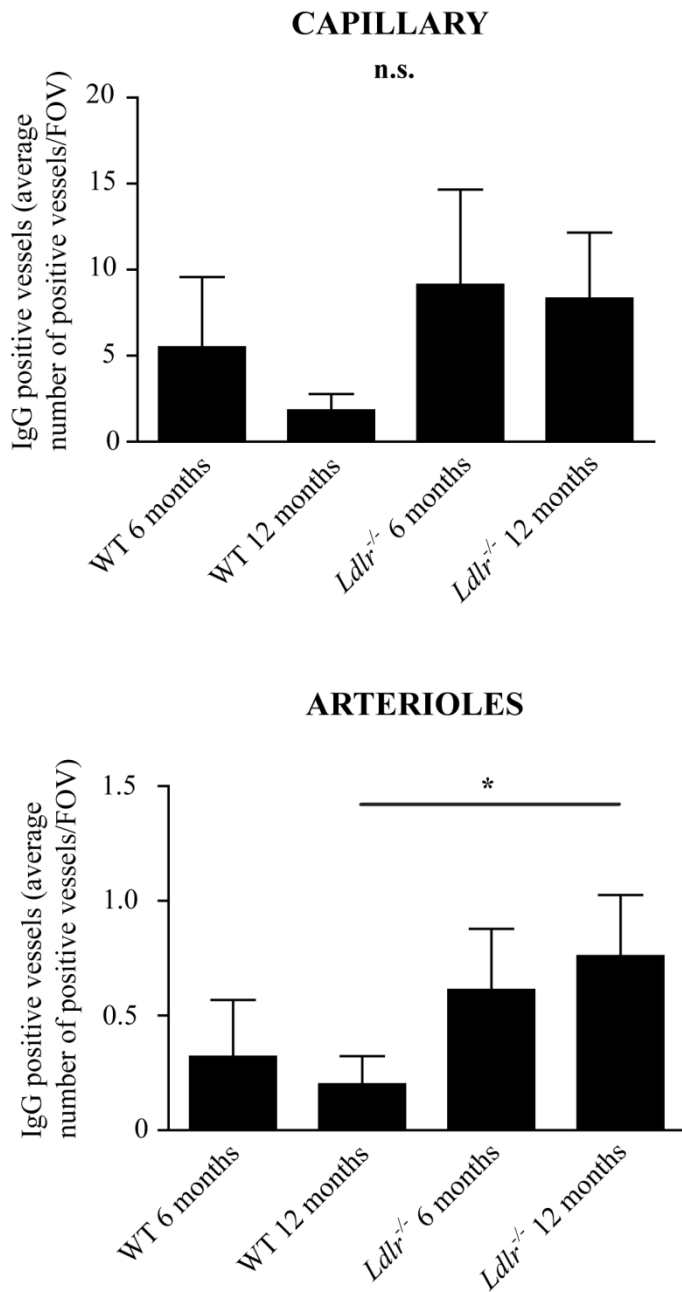

**S6 Fig.** IgG positive capillaries or arterioles of 6 and 12 months old WT and *Ldlr*<sup>-/-</sup> mice. Analysis of variance with Bonferroni post-hoc test, \*  $P < 0.05$ . WT, wild-type; *Ldlr*<sup>-/-</sup>, low-density lipoprotein receptor deficient mice; n.s., not significant.
