# Supplementary material for: Hypercholesterolemia induced cerebral small vessel disease
Source: PLOS journal article supplement (doi:10.1371/journal.pone.0182822), 2017-08-10
Supplement: S3 (10.1371/journal.pone.0182822.s003) [file journal.pone.0182822.s003]

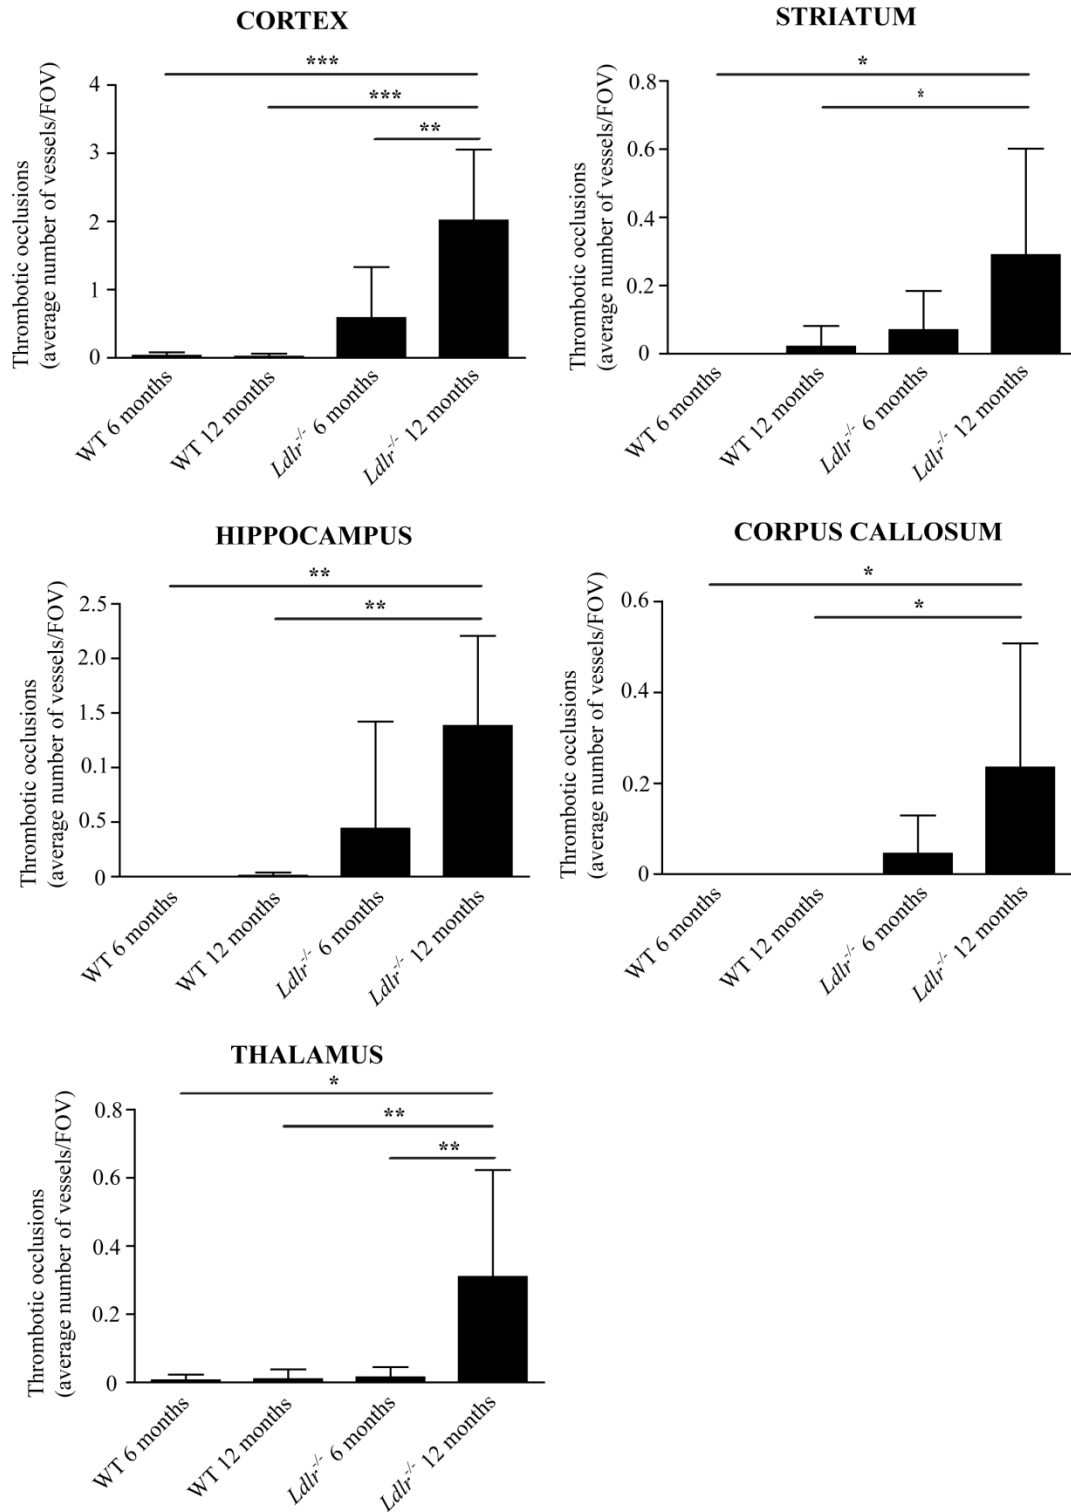

**S3 Fig.** Thrombotic occlusions (referred to as suspected fibrin thrombi) of capillaries and arterioles of 6 and 12 months old WT and *Ldlr*<sup>-/-</sup> mice: analysis of different brain regions (cortex, striatum, hippocampus, corpus callosum, thalamus). Analysis of variance with Bonferroni post-hoc test, \*  $P < 0.05$ , \*\*  $P < 0.01$ , \*\*\*  $P < 0.001$ . WT, wild-type; *Ldlr*<sup>-/-</sup>, low-density lipoprotein receptor deficient mice.
